# Supplementary material for: Mitochondrial Haplogroups and Polymorphisms Reveal No Association with Sporadic Prostate Cancer in a Southern European Population
Source: PubMed Central journal article supplement (PMC3398884; doi:10.1371/journal.pone.0041201), 2012-07-17
Supplement: pone.0041201.s001.pdf [file pone.0041201.s001.pdf]

**Table S1: Control region polymorphisms and haplogroup classification for 239 patients of sporadic prostate cancer.**

| <b>Individuals</b>                                                                                                                                                                                                                            | <b>N</b> | <b>HAPLOGROUPS</b> | <b>HV1 Polymorphisms</b>                  |
|-----------------------------------------------------------------------------------------------------------------------------------------------------------------------------------------------------------------------------------------------|----------|--------------------|-------------------------------------------|
| CP16/07, CP24/07, CP46/07, CP48/07, CP49/07, CP54/07, CP61/07, CP68/07, CP76/07, CP92/07, CP96/07, CP103/07, CP110/07, CP121/07, CP122/07, CP125/07, CP14/08, CP16/08, CP22/08, CP29/08, CP37/08, CP52/08, CP59/08, CP64/08, CP65/08, CP71/08 | 26       | H                  | No polymorphisms                          |
| CP78/07, CP117/07, CP118/07, CP01/08, CP20/08, CP36/08, CP48/08, CP61/08, CP66/08, CP68/08, CP33/08                                                                                                                                           | 9        | H+16362            | 16362C                                    |
| CP23/07, CP58/07, CP87/07, CP124/07, CP35/08, CP40/08, CP78/08, CP102/08                                                                                                                                                                      | 8        | HV0                | 16298C                                    |
| CP35/07, CP104/07, CP115/07, CP18/08, CP62/08, CP89/08                                                                                                                                                                                        | 6        | H1j+16129          | 16129A                                    |
| CP119/07                                                                                                                                                                                                                                      | 5        | H5                 | 16304C                                    |
| CP18/07, CP55/07, CP83/07, CP127/07, CP06/08                                                                                                                                                                                                  | 5        | J                  | 16069T 16126C                             |
| CP42/07, CP43/07, CP91/07, CP95/07, CP05/08                                                                                                                                                                                                   | 5        | K                  | 16224C 16311C                             |
| CP06/07, CP07/07, CP10/08, CP49/08                                                                                                                                                                                                            | 4        | J2a1a              | 16069T 16126C 16145A 16231C 16261T        |
| CP04/07, CP39/08, CP76/08, CP79/08                                                                                                                                                                                                            | 4        | U4                 | 16356C                                    |
| CP51/07, CP25/08, CP91/08                                                                                                                                                                                                                     | 3        | H2a2b              | 16291T                                    |
| CP22/07, CP70/07, CP77/07                                                                                                                                                                                                                     | 3        | H2b                | 16311C                                    |
| CP80/07, CP85/07, CP105/07                                                                                                                                                                                                                    | 3        | H5                 | 16304C                                    |
| CP128/07, CP38/08, CP41/08                                                                                                                                                                                                                    | 3        | K1a5               | 16224C 16311C 16362C                      |
| CP83/08, CP85/08, CP105/08                                                                                                                                                                                                                    | 3        | L2-6               | 16187T 16298C 16311C                      |
| CP45/07, CP58/08, CP99/08                                                                                                                                                                                                                     | 3        | T                  | 16294T                                    |
| CP30/07, CP31/07                                                                                                                                                                                                                              | 2        | H1b                | 16189C 16356C 16362C                      |
| CP08/08, CP30/08                                                                                                                                                                                                                              | 2        | H20a               | 16218T 16328A 16362C                      |
| CP34/08, CP43/08                                                                                                                                                                                                                              | 2        | H2b                | 16311C                                    |
| CP116/07, CP123/07                                                                                                                                                                                                                            | 2        | H5                 | 16294T 16304C 16320T                      |
| CP36/07                                                                                                                                                                                                                                       | 2        | H6a1a1a            | 16311C 16362C                             |
| CP93/07, CP98/07                                                                                                                                                                                                                              | 2        | HV0                | 16129A 16298C                             |
| CP42/08, CP109/08                                                                                                                                                                                                                             | 2        | HV4b               | 16069T 16126C                             |
| CP82/07, CP84/07                                                                                                                                                                                                                              | 2        | J2a1               | 16069T 16126C 16231C                      |
| CP84/08, CP96/08                                                                                                                                                                                                                              | 2        | L3e2               | 16223T 16292T 16320T                      |
| CP09/08, CP15/08                                                                                                                                                                                                                              | 2        | R0a                | 16126C 16362C                             |
| CP17/07, CP101/07                                                                                                                                                                                                                             | 2        | R8a1+16093         | 16093C                                    |
| CP50/07, CP112/07                                                                                                                                                                                                                             | 2        | R8b2               | 16172C                                    |
| CP89/07, CP108/07                                                                                                                                                                                                                             | 2        | T1a                | 16126C 16163G 16186T 16189C 16294T        |
| CP12/07, CP26/08                                                                                                                                                                                                                              | 2        | U2d                | 16051G 16183C 16189C 16234T 16266T 16294T |
| CP27/07, CP120/07                                                                                                                                                                                                                             | 2        | U3                 | 16343G                                    |
| CP26/07, CP100/07                                                                                                                                                                                                                             | 2        | U5a1+16192!        | 16256T 16270T                             |
| CP40/07, CP04/08                                                                                                                                                                                                                              | 2        | U5a1d2a            | 16145A 16172C 16189C 16243C 16256T 16270T |

| <b>Individuals</b> | <b>N</b> | <b>HAPLOGROUPS</b> | <b>HV1 Polymorphisms</b>                            |
|--------------------|----------|--------------------|-----------------------------------------------------|
| CP59/07, CP79/07   | 2        | U6a                | 16172C 16219G 16278T                                |
| CP112/08           | 1        | D4m2               | 16042A                                              |
| CP36/08            | 1        | H+16362            | 16189C 16298C 16362C                                |
| CP33/08            | 1        | H1+16189           | 16189C                                              |
| CP10/07            | 1        | H11a1              | 16278T 16311C                                       |
| CP11/07            | 1        | H11a1              | 16278T                                              |
| CP03/07            | 1        | H1a                | 16162G                                              |
| CP64/07            | 1        | H1b                | 16189C 16255A 16356C 16362C                         |
| CP23/08            | 1        | H1b                | 16182C 16183C 16189C 16356C                         |
| CP45/08            | 1        | H1j+16129          | 16129A 16298C 16362C                                |
| CP110/08           | 1        | H1j+16129          | 16129A 16223T                                       |
| CP46/08            | 1        | H24                | 16129A 16134T 16240G 16286A 16293G 16356C           |
| CP82/08            | 1        | H24                | 16293G 16311C                                       |
| CP90/07            | 1        | H2a1               | 16192T 16354T                                       |
| CP94/07            | 1        | H2a2               | 16150T 16320T                                       |
| CP126/07           | 1        | H2a2               | 16254R                                              |
| CP32/08            | 1        | H2a2               | 16247T 16342C                                       |
| CP107/08           | 1        | H2a2               | 16076T 16261T                                       |
| CP102/07           | 1        | H2a2b1             | 16235G 16291T                                       |
| CP113/07           | 1        | H2b                | 16248T 16311C                                       |
| CP97/08            | 1        | H2b                | 16311C 16355T                                       |
| CP98/08            | 1        | H2b                | 16266T 16304C 16311C                                |
| CP07/08            | 1        | H5                 | 16290T 16304C                                       |
| CP19/07            | 1        | H6b                | 16180G 16300G 16325C 16362C                         |
| CP39/07            | 1        | H7a1               | 16129A 16261T                                       |
| CP21/07            | 1        | HV0                | 16234T 16298C                                       |
| CP32/07            | 1        | HV0                | 16234T 16298C                                       |
| CP33/07            | 1        | HV0                | 16129A 16271A 16298C                                |
| CP75/07            | 1        | HV0                | 16234T 16298C                                       |
| CP98/07            | 1        | HV0                | 16129A 16298C                                       |
| CP57/08            | 1        | HV0                | 16129A 16271A 16298C                                |
| CP92/08            | 1        | HV2a               | 16335G                                              |
| CP53/08            | 1        | HV4b               | 16069T 16126C 16291T 16293G                         |
| CP69/08            | 1        | HV4b               | 16069T 16126C 16278T 16362C                         |
| CP02/07            | 1        | I                  | 16129A 16223T                                       |
| CP80/08            | 1        | I                  | 16129A 16148T 16223T                                |
| CP34/07            | 1        | J                  | 16069T 16114T 16126C 16259A                         |
| CP65/07            | 1        | J                  | 16069T 16126C 16182C 16183C 16189C 16290T<br>16362C |
| CP99/07            | 1        | J                  | 16069T 16093C 16126C 16278T                         |
| CP60/08            | 1        | J1d                | 16069T 16126C 16193T                                |
| CP108/08           | 1        | J1d                | 16069T 16126C 16193T 16362C                         |
| CP63/07            | 1        | J2b1a              | 16069T 16126C 16193T 16278T                         |
| CP66/07            | 1        | J2b1a              | 16069T 16126C 16145A 16193T 16278T 16344T           |
| CP24/08            | 1        | JT                 | 16126C                                              |
| CP47/08            | 1        | K                  | 16224C 16270T 16311C                                |
| CP74/08            | 1        | K                  | 16092C 16184A 16224C 16311C                         |

| <b>Individuals</b> | <b>N</b> | <b>HAPLOGROUPS</b> | <b>HV1 Polymorphisms</b>                                                                                |
|--------------------|----------|--------------------|---------------------------------------------------------------------------------------------------------|
| CP20/07            | 1        | K1a1               | 16093C 16224C 16290T 16311C                                                                             |
| CP44/08            | 1        | K2a1a              | 16224C 16311C                                                                                           |
| CP63/08            | 1        | K2a1a              | 16224C 16298C                                                                                           |
| CP29/07            | 1        | K2b1               | 16224C 16270T 16362C                                                                                    |
| CP109/07           | 1        | K2c                | 16192T 16224C 16311C                                                                                    |
| CP72/07            | 1        | L0a1b              | 16129C 16148T 16168T 16172C 16187T 16188G<br>16189C 16214T 16223T 16230G 16278T 16293G<br>16311C 16320T |
| CP38/07            | 1        | L1b                | 16126C 16187T 16189C 16223T 16264T 16270T<br>16278T 16293G 16311C                                       |
| CP67/07            | 1        | L1b                | 16126C 16187T 16189C 16223T 16264T 16270T<br>16278T 16293G 16311C 16317G                                |
| CP81/08            | 1        | L2a1c5             | 16129A 16223T 16278T 16294T 16309G                                                                      |
| CP70/08            | 1        | L3e5               | 16041G 16172C 16223T                                                                                    |
| CP74/07            | 1        | L3h2               | 16184T 16304C                                                                                           |
| CP129/07           | 1        | L3i2               | 16260T 16311C                                                                                           |
| CP56/08            | 1        | L3x1+16311         | 16169T 16290T 16311C                                                                                    |
| CP75/08            | 1        | M1                 | 16129A 16183C 16189C 16223T 16249C 16311C                                                               |
| CP44/07            | 1        | M25                | 16129A 16223T 16304C                                                                                    |
| CP100/08           | 1        | M2a1a3+16093       | 16093C 16224C 16270T 16311C 16319A                                                                      |
| CP28/07            | 1        | M5a1               | 16129A 16223T 16291T 16298C                                                                             |
| CP111/07           | 1        | M5c2               | 16240G                                                                                                  |
| CP86/08            | 1        | N                  | 16223T                                                                                                  |
| CP56/07            | 1        | N1b1+16129         | 16086C 16129A 16145A 16176G 16223T                                                                      |
| CP47/07            | 1        | P3a                | 16145A                                                                                                  |
| CP52/07            | 1        | R11                | 16189C 16311C                                                                                           |
| CP77/08            | 1        | R23                | 16256T 16270T                                                                                           |
| CP11/08            | 1        | R5a                | 16266T 16304C 16311C 16362G 16363T                                                                      |
| CP73/08            | 1        | R8a1+16093         | 16093C 16129A                                                                                           |
| CP104/08           | 1        | R8a1+16093         | 16093C 16224C 16290T 16311C                                                                             |
| CP106/08           | 1        | R8a1+16093         | 16093C 16126C                                                                                           |
| CP93/08            | 1        | T                  | 16126C 16292T 16294T                                                                                    |
| CP05/07            | 1        | T1a                | 16126C 16163G 16186T 16189C 16294T 16335G                                                               |
| CP12/08            | 1        | T1a                | 16126C 16163G 16186T 16189C 16234T 16294T                                                               |
| CP71/07            | 1        | T2a1b              | 16126C 16287T 16294T 16296T 16324C                                                                      |
| CP09/07            | 1        | T2b                | 16126C 16207G 16294T 16296T 16304C                                                                      |
| CP31/08            | 1        | T2b                | 16126C 16145A 16294T 16296T 16304C                                                                      |
| CP69/07            | 1        | T2b3a              | 16126C 16183C 16189C 16292T 16294T 16296T<br>16304C                                                     |
| CP67/08            | 1        | T2c                | 16126C 16291T 16292T 16296T                                                                             |
| CP19/08            | 1        | T2f                | 16126C 16189C 16196A 16294T 16296T                                                                      |
| CP60/07            | 1        | U2e1               | 16051G 16111T 16129C 16145A 16189C 16362C                                                               |
| CP87/08            | 1        | U2e1               | 16051G 16129C 16183C 16189C 16362C                                                                      |
| CP55/08            | 1        | U4                 | 16183C 16189C 16356C                                                                                    |
| CP90/08            | 1        | U4a1               | 16134T 16240G 16286A 16293G 16356C                                                                      |
| CP25/07            | 1        | U5                 | 16192T 16270T 16319A                                                                                    |
| CP28/08            | 1        | U5                 | 16074G 16189C 16192T 16270T                                                                             |

| <b>Individuals</b> | <b>N</b> | <b>HAPLOGROUPS</b> | <b>HV1 Polymorphisms</b>                  |
|--------------------|----------|--------------------|-------------------------------------------|
| CP13/07            | 1        | U5a                | 16192T 16256T 16270T                      |
| CP21/08            | 1        | U5a1c              | 16227G 16256T 16270T 16320T               |
| CP01/07            | 1        | U5b1b1+16192!      | 16183C 16189C 16270T                      |
| CP08/07            | 1        | U5b1b1+16192!      | 16111T 16189C 16270T                      |
| CP62/07            | 1        | U5b1b1+16192!      | 16189C 16270T                             |
| CP88/08            | 1        | U5b1b1+16192!      | 16093C 16183C 16189C 16270T               |
| CP73/07            | 1        | U5b1b1b            | 16183C 16189C 16270T 16320T 16357C        |
| CP94/08            | 1        | U5b1b1b            | 16192T 16256T 16270T 16286T 16320T        |
| CP17/08            | 1        | U5b1c              | 16051G 16172C 16189C 16192T 16270T 16311C |
| CP81/07            | 1        | U5b1d              | 16270T                                    |
| CP130/07           | 1        | U5b1d              | 16270T 16274A 16311C 16325C               |
| CP27/08            | 1        | U5b1d              | 16129A 16192T 16270T 16325C               |
| CP50/08            | 1        | U5b1d              | 16227G 16256T 16270T 16316G 16320T        |
| CP41/07            | 1        | U5b2a1b            | 16325C                                    |
| CP14/07            | 1        | U6a                | 16145A 16172C 16219G 16235A 16278T        |
| CP15/07            | 1        | U6a                | 16172C 16219G 16278T                      |
| CP37/07            | 1        | U6a                | 16172C 16192T 16219G 16278T               |
| CP88/07            | 1        | U6a                | 16172C 16219G 16224C 16234T 16278T        |
| CP13/08            | 1        | U6a                | 16092C 16172C 16219G 16278T               |
| CP106/07           | 1        | W1e                | 16223T 16292T 16295T                      |
| CP53/07            | 1        | W6                 | 16192T 16223T 16292T 16325C 16342C        |
| CP57/07            | 1        | W6                 | 16192T 16223T 16292T 16325C               |
| CP51/08            | 1        | W6                 | 16093C 16192T 16223T 16292T 16325C        |
| CP86/07            | 1        | X                  | 16183C 16189C 16223T 16278T               |
| CP101/08           | 1        | X                  | 16189C 16192T 16223T 16278T 16304C        |
| CP54/08            | 1        | X2j                | 16179T 16188T 16189C 16223T 16278T        |
