# Supplementary material for: Mitochondrial Haplogroups and Polymorphisms Reveal No Association with Sporadic Prostate Cancer in a Southern European Population
Source: PubMed Central journal article supplement (PMC3398884; doi:10.1371/journal.pone.0041201), 2012-07-17
Supplement: pone.0041201.s002.pdf [file pone.0041201.s002.pdf]

**Table S2: Control region polymorphisms and haplogroup classification for 150 controls.**

| <b>Individuals</b>                                                                                                                                                        | <b>N</b> | <b>HAPLOGROUPS</b> | <b>HV1 Polymorphisms</b>                                       |
|---------------------------------------------------------------------------------------------------------------------------------------------------------------------------|----------|--------------------|----------------------------------------------------------------|
| CP119/08, CP129/08, CP144/08, CP148/08, CP150/08, CP155/08, CP159/08, CP166/08, CP170/08, CP185/08, CP196/08, CP214/08, CP227/08, CP234/08, CP240/08, CP246/08, CP259/08, | 18       | H                  |                                                                |
| CP136/08, CP171/08, CP176/08, CP189/08, CP244/08, CP268/08                                                                                                                | 6        | H5                 | 16304C                                                         |
| CP116/08, CP130/08, CP164/08, CP218/08                                                                                                                                    | 4        | H+16362            | 16362C                                                         |
| CP163/08, CP168/08, CP188/08                                                                                                                                              | 4        | K                  | 16224C 16311C                                                  |
| CP128/08, CP199/08, CP241/08                                                                                                                                              | 3        | H1j+16129          | 16129A                                                         |
| CP117/08, CP125/08, CP162/08                                                                                                                                              | 3        | H2b                | 16311C                                                         |
| CP175/08, CP198/08, CP222/08                                                                                                                                              | 3        | HV0                | 16298C                                                         |
| CP126/08, CP151/08, CP258/08                                                                                                                                              | 3        | J                  | 16069T 16126C                                                  |
| CP133/08, CP140/08, CP169/08                                                                                                                                              | 3        | J2b1a              | 16069T 16126C 16278T                                           |
| CP139/08, CP186/08, CP195/08, CP223/08                                                                                                                                    | 3        | K1a1               | 16093C 16224C 16311C                                           |
| CP132/08, CP191/08,                                                                                                                                                       | 3        | U5b1d              | 16270T                                                         |
| CP226/08, CP239/08                                                                                                                                                        | 2        | H+16192            | 16192T                                                         |
| CP137/08, CP167/08                                                                                                                                                        | 2        | H1+16189           | 16183C 16189C                                                  |
| CP212/08, CP250/08                                                                                                                                                        | 2        | H11a1              | 16278T                                                         |
| CP216/08, CP257/08                                                                                                                                                        | 2        | J2b1a              | 16069T 16126C 16193T 16278T                                    |
| CP123/08, CP206/08                                                                                                                                                        | 2        | L1b                | 16126C 16187T 16189C 16223T 16264T 16270T 16278T 16311C 16360T |
| CP143/08, CP205/08                                                                                                                                                        | 2        | T2b3a              | 16126C 16183C 16189C 16292T 16294T 16296T 16304C               |
| CP142/08, CP236/08                                                                                                                                                        | 2        | U5                 | 16192T 16270T 16319A                                           |
| CP255/08                                                                                                                                                                  | 1        | D1f                | 16142T 16223T 16325C 16362C                                    |
| CP203/08                                                                                                                                                                  | 1        | F1a2               | 16172C 16304C 16311C                                           |
| CP152/08                                                                                                                                                                  | 1        | H+16362            | 16102G 16104A 16362C                                           |
| CP248/08                                                                                                                                                                  | 1        | H+16362            | 16170G 16362C                                                  |
| CP243/08                                                                                                                                                                  | 1        | H1a1               | 16162G 16209C 16239T                                           |
| CP127/08                                                                                                                                                                  | 1        | H1f                | 16093C 16189C                                                  |
| CP146/08                                                                                                                                                                  | 1        | H1k                | 16189C 16219G 16278T 16290T 16311C                             |
| CP181/08                                                                                                                                                                  | 1        | H1x                | 16037G                                                         |
| CP135/08                                                                                                                                                                  | 1        | H20                | 16218T 16298C                                                  |
| CP235/08                                                                                                                                                                  | 1        | H20                | 16218T                                                         |
| CP141/08                                                                                                                                                                  | 1        | H20a               | 16218T 16328A 16362C                                           |
| CP245/08                                                                                                                                                                  | 1        | H24                | 16213A 16293G                                                  |
| CP215/08                                                                                                                                                                  | 1        | H27                | 16129A 16316G                                                  |
| CP251/08                                                                                                                                                                  | 1        | H2a1               | 16354T                                                         |
| CP242/08                                                                                                                                                                  | 1        | H2a2               | 16239T 16242T                                                  |
| CP118/08                                                                                                                                                                  | 1        | H2a2b              | 16291T                                                         |
| CP217/08                                                                                                                                                                  | 1        | H5                 | 16294T 16304C 16320T                                           |

| <b>Individuals</b> | <b>N</b> | <b>HAPLOGROUPS</b> | <b>HV1 Polymorphisms</b>                                          |
|--------------------|----------|--------------------|-------------------------------------------------------------------|
| CP149/08           | 1        | H7a1               | 16261T                                                            |
| CP197/08           | 1        | HV0                | 16240G 16298C                                                     |
| CP230/08           | 1        | HV0                | 16075C 16189C 16298C                                              |
| CP247/08           | 1        | HV0                | 16180G 16189C 16298C                                              |
| CP202/08           | 1        | HV13               | 16294T 16357C 16358T 16363T                                       |
| CP253/08           | 1        | HV2a               | 16335G                                                            |
| CP265/08           | 1        | I                  | 16086C 16129A 16223T                                              |
| CP120/08           | 1        | I5a                | 16129A 16148T 16223T 16291T 16298C                                |
| CP190/08           | 1        | J                  | 16069T 16126C 16278T 16362C                                       |
| CP228/08           | 1        | J1b1a1             | 16069T 16126C 16145A 16172C 16222T                                |
| CP114/08           | 1        | J1c+16261          | 16069T 16126C 16261T                                              |
| CP174/08           | 1        | J2a1a              | 16069T 16126C 16140C 16145A 16231C<br>16261T                      |
| CP208/08           | 1        | J2a1a              | 16069T 16126C 16145A 16231C 16261T<br>16311C                      |
| CP219/08           | 1        | J2b                | 16069T 16126C 16179A 16193T 16278T<br>16311C                      |
| CP156/08           | 1        | J2b1a              | 16069T 16126C 16193T 16250S 16278T                                |
| CP264/08           | 1        | J2b1a              | 16069T 16126C 16193T 16278T 16311C                                |
| CP113/08           | 1        | K                  | 16124C 16224C 16271C 16311C                                       |
| CP179/08           | 1        | K                  | 16224C 16235G 16311C                                              |
| CP145/08           | 1        | K1a1               | 16093C 16192T 16224C 16239T 16311C                                |
| CP201/08           | 1        | K1b1a2             | 16093C 16224C 16311C 16318T 16319A                                |
| CP157/08           | 1        | L1b                | 16126C 16187T 16189C 16223T 16264T<br>16270T 16278T 16293G 16311C |
| CP221/08           | 1        | L1b1               | 16126C 16187T 16189C 16223T 16264T<br>16270T 16278T 16311C        |
| CP154/08           | 1        | L3a                | 16316G                                                            |
| CP124/08           | 1        | L3h1               | 16223T 16311C                                                     |
| CP231/08           | 1        | L3h1b1a            | 16179T 16223T 16243C 16256A 16284G<br>16311C 16320T               |
| CP262/08           | 1        | L3i2               | 16260T 16311C                                                     |
| CP252/08           | 1        | L3x                | 16169T                                                            |
| CP261/08           | 1        | M18                | 16223T 16318T                                                     |
| CP256/08           | 1        | M5a1               | 16129A 16223T 16291T 16298C                                       |
| CP187/08           | 1        | M5c2               | 16240G                                                            |
| CP260/08           | 1        | M65a               | 16289G                                                            |
| CP122/08           | 1        | N1b                | 16145A 16176G 16223T                                              |
| CP225/08           | 1        | O                  | 16213A                                                            |
| CP204/08           | 1        | P+16176            | 16176T                                                            |
| CP220/08           | 1        | P+16176            | 16176T 16219G                                                     |
| CP200/08           | 1        | R0a                | 16126C 16362C                                                     |
| CP232/08           | 1        | R0a                | 16126C 16209C 16362C                                              |
| CP173/08           | 1        | T1a                | 16126C 16163G 16186T 16189C 16294T                                |
| CP165/08           | 1        | T2b                | 16126C 16241G 16294T 16296T 16304C                                |
| CP177/08           | 1        | T2b                | 16126C 16294T 16296T 16304C                                       |
| CP131/08           | 1        | T2b+16296!         | 16126C 16147T 16294T 16297C 16304C                                |
| CP134/08           | 1        | T2c                | 16126C 16292T 16294T 16296T                                       |

| <b>Individuals</b> | <b>N</b> | <b>HAPLOGROUPS</b> | <b>HV1 Polymorphisms</b>                            |
|--------------------|----------|--------------------|-----------------------------------------------------|
| CP172/08           | 1        | U2                 | 16051G                                              |
| CP115/08           | 1        | U3                 | 16343G                                              |
| CP183/08           | 1        | U3                 | 16343G 16357C 16358T 16363T                         |
| CP238/08           | 1        | U3                 | 16260T 16343G                                       |
| CP194/08           | 1        | U4                 | 16356C                                              |
| CP266/08           | 1        | U5                 | 16192T 16270T                                       |
| CP229/08           | 1        | U5a                | 16192T 16256T 16270T 16311C                         |
| CP209/08           | 1        | U5a1+16192!        | 16256T 16270T                                       |
| CP233/08           | 1        | U5a1+16192!        | 16227G 16256T 16270T 16316G                         |
| CP237/08           | 1        | U5a1b1             | 16192T 16256T 16270T 16291T                         |
| CP254/08           | 1        | U5a1c              | 16180G 16192T 16256T 16270T 16320T                  |
| CP224/08           | 1        | U5b1+16189         | 16189C 16192T 16270T                                |
| CP153/08           | 1        | U5b1b1+16192!      | 16172C 16183C 16189C 16270T 16274A<br>16311C 16325C |
| CP207/08           | 1        | U5b3               | 16192T 16270T 16304C                                |
| CP192/08           | 1        | U6a                | 16172C 16219G 16278T                                |
| CP249/08           | 1        | U6a                | 16169Y 16172C 16219G 16278T                         |
| CP147/08           | 1        | U6a'b'd+16311      | 16172C 16174T 16219G 16311C                         |
| CP210/08           | 1        | V7a                | 16153A 16186T 16298C                                |
| CP267/08           | 1        | V7a                | 16153A 16189C 16298C                                |
| CP138/08           | 1        | W                  | 16223T 16234T 16292T                                |
| CP211/08           | 1        | W                  | 16223T 16292T                                       |
| CP121/08           | 1        | X                  | 16189C 16223T 16278T                                |
| CP178/08           | 1        | X2h                | 16129A 16189C 16278T 16311C 16362C                  |
| CP193/08           | 1        | X2h                | 16189C 16278T 16311C                                |
