# Supplementary material for: Mitochondrial Haplogroups and Polymorphisms Reveal No Association with Sporadic Prostate Cancer in a Southern European Population
Source: PubMed Central journal article supplement (PMC3398884; doi:10.1371/journal.pone.0041201), 2012-07-17
Supplement: pone.0041201.s003.pdf [file pone.0041201.s003.pdf]

Table S3: Table of significant linkage disequilibrium of CR polymorphisms.

| Locus | 16069                 | 16126                 | 16129                 | 16145                 | 16172                 | 16183                 | 16189                 | 16192                 | 16223                 | 16224                 | 16270                 | 16278                 | 16294                 | 16298                 | 16304                 | 16311                 | 16356 | 16362                 |
|-------|-----------------------|-----------------------|-----------------------|-----------------------|-----------------------|-----------------------|-----------------------|-----------------------|-----------------------|-----------------------|-----------------------|-----------------------|-----------------------|-----------------------|-----------------------|-----------------------|-------|-----------------------|
| 16069 |                       | p=0.000<br>r2=0.499   | -                     | p=0.000<br>r2=0.070   | -                     | -                     | -                     | -                     | -                     | -                     | -                     | p=0.0002<br>r2=0.0449 | -                     | -                     | p=0.0199<br>r2=0.0105 | p=0.0072<br>r2=0.0167 | -     | -                     |
| 16126 | p=0.000<br>r2=0.499   |                       | p=0.0018<br>r2=0.022  | p=0.0009<br>r2=0.039  | p=0.0197<br>r2=0.011  | -                     | -                     | p=0.0198<br>r2=0.0111 | -                     | p=0.0046<br>r2=0.0188 | -                     | p=0.000<br>r2=0.0480  | p=0.000<br>r2=0.0988  | -                     | -                     | -                     | -     | -                     |
| 16129 | -                     | p=0.0018<br>r2=0.022  |                       | -                     | -                     | -                     | -                     | -                     | p=0.000<br>r2=0.0659  | -                     | -                     | -                     | -                     | p=0.0006<br>r2=0.0346 | -                     | -                     | -     | -                     |
| 16145 | p=0.000<br>r2=0.070   | p=0.0009<br>r2=0.039  | -                     |                       | p=0.0039<br>r2=0.0222 | -                     | -                     | -                     | -                     | -                     | -                     | -                     | -                     | -                     | -                     | -                     | -     | -                     |
| 16172 | -                     | p=0.0197<br>r2=0.011  | -                     | p=0.0039<br>r2=0.0222 |                       | -                     | -                     | -                     | -                     | -                     | -                     | p=0.000<br>r2=0.1351  | -                     | -                     | -                     | -                     | -     | -                     |
| 16183 | -                     | -                     | -                     | -                     | -                     |                       | p=0.000<br>r2=0.2886  | -                     | -                     | -                     | -                     | -                     | p=0.0038<br>r2=0.0412 | -                     | -                     | -                     | -     | p=0.0110<br>r2=0.0132 |
| 16189 | -                     | -                     | -                     | -                     | -                     | p=0.000<br>r2=0.2886  |                       | p=0.0024<br>r2=0.0319 | p=0.0229<br>r2=0.0136 | p=0.000<br>r2=0.0785  | p=0.0004<br>r2=0.0415 | p=0.0002<br>r2=0.0400 | -                     | -                     | -                     | -                     | -     | p=0.0136<br>r2=0.0243 |
| 16192 | -                     | p=0.0198<br>r2=0.0111 | -                     | -                     | -                     | -                     | -                     |                       | -                     | -                     | p=0.000<br>r2=0.1006  | -                     | -                     | -                     | -                     | -                     | -     | -                     |
| 16223 | -                     | -                     | p=0.000<br>r2=0.0659  | -                     | -                     | -                     | p=0.0024<br>r2=0.0319 | -                     |                       | -                     | -                     | p=0.000<br>r2=0.0566  | -                     | -                     | -                     | -                     | -     | -                     |
| 16224 | -                     | p=0.0046<br>r2=0.0188 | -                     | -                     | -                     | -                     | p=0.0229<br>r2=0.0136 | -                     |                       | -                     | -                     | -                     | -                     | -                     | -                     | p=0.000<br>r2=0.2992  | -     | -                     |
| 16270 | -                     | -                     | -                     | -                     | -                     | -                     | p=0.000<br>r2=0.0785  | p=0.000<br>r2=0.1006  | -                     |                       | -                     | -                     | -                     | -                     | -                     | -                     | -     | -                     |
| 16278 | p=0.0002<br>r2=0.0449 | p=0.000<br>r2=0.0480  | -                     | -                     | p=0.000<br>r2=0.1351  | -                     | p=0.0004<br>r2=0.0415 | p=0.000<br>r2=0.0566  | -                     | -                     |                       | -                     | -                     | -                     | -                     | -                     | -     | -                     |
| 16294 | -                     | p=0.000<br>r2=0.0988  | -                     | -                     | -                     | p=0.0038<br>r2=0.0412 | p=0.0002<br>r2=0.0400 | -                     | -                     | -                     | -                     | -                     | -                     | -                     | p=0.000<br>r2=0.1052  | p=0.0027<br>r2=0.0185 | -     | -                     |
| 16298 | -                     | -                     | p=0.0006<br>r2=0.0346 | -                     | -                     | -                     | -                     | -                     | -                     | -                     | -                     | -                     | -                     |                       | -                     | -                     | -     | -                     |
| 16304 | p=0.0199<br>r2=0.0105 | -                     | -                     | -                     | -                     | -                     | -                     | -                     | -                     | -                     | -                     | -                     | p=0.000<br>r2=0.1052  | -                     |                       | -                     | -     | p=0.0020<br>r2=0.0062 |
| 16311 | p=0.0072<br>r2=0.0167 | -                     | -                     | -                     | -                     | -                     | -                     | -                     | p=0.000<br>r2=0.2992  | -                     | -                     | -                     | p=0.0027<br>r2=0.0185 | -                     |                       | -                     | -     | -                     |
| 16356 | -                     | -                     | -                     | -                     | -                     | p=0.0110<br>r2=0.0132 | p=0.0136<br>r2=0.0243 | -                     | -                     | -                     | -                     | -                     | -                     | -                     | -                     | -                     | -     | -                     |
| 16362 | -                     | -                     | -                     | -                     | -                     | -                     | -                     | -                     | -                     | -                     | -                     | -                     | -                     | p=0.0020<br>r2=0.0062 | -                     | -                     | -     | -                     |

Table of significant linkage disequilibrium: Test of linkage disequilibrium for all pairs of loci (Slatkin, M. 1994a., Slatkin, M. and Excoffier, L. 1996). In green, all those positions that are out of balance (significance level=0.05). p= p-value; r2= standardized disequilibrium values. N° of steps=10000, demorization steps=1000
